# Supplementary material
Source: PubMed Central journal article supplement (PMC8598389)
Supplement: 10-1055-s-0041-1739517-s210101ra.pdf [file 10-1055-s-0041-1739517-s210101ra.pdf]

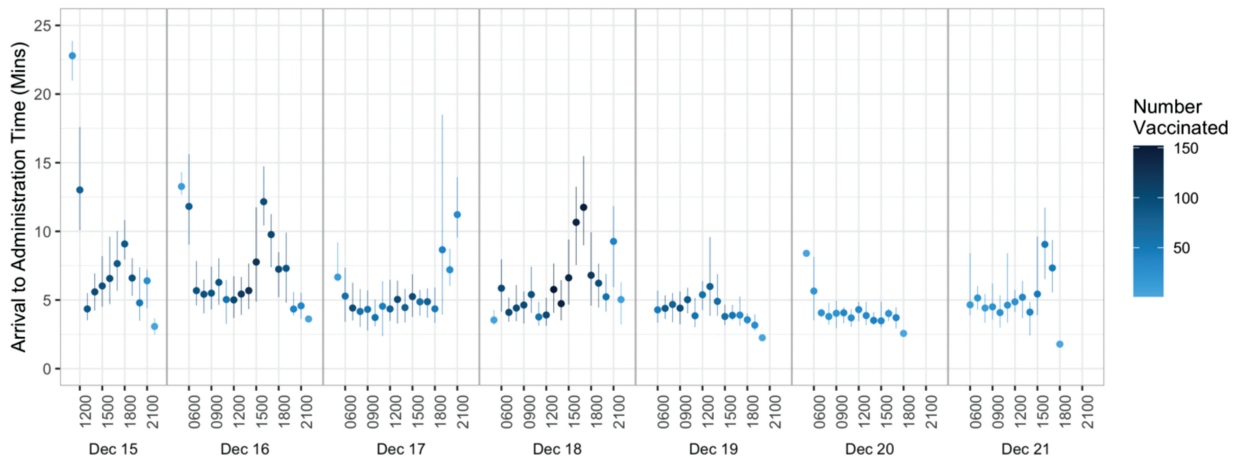

Supplementary Figure S1 Time from arrival at vaccine site to vaccine administration.

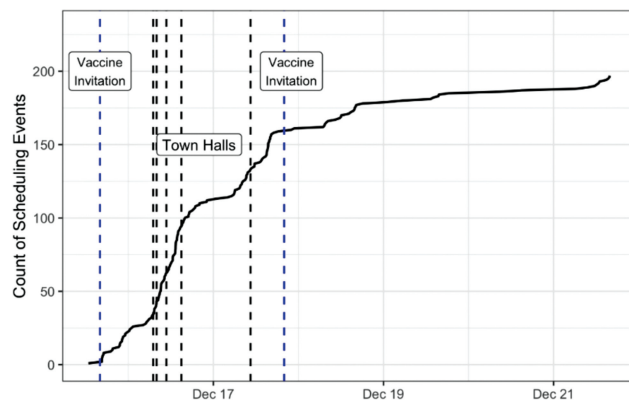

Supplementary Figure S2 Scheduled immunization appointments by facility and food service employees in temporal relationship to town hall meetings.

Supplementary Table S1 Time from invitation to scheduling of vaccine by provider and phase

| Phase   | Administration | Ancillary clinical | Facility/food services | Nursing          | Providers     | Research staff  |
|---------|----------------|--------------------|------------------------|------------------|---------------|-----------------|
| Overall | 231 (11, 977)  | 577 (53, 1,193)    | 588 (-81, 1,278)       | 462 (44, 1,719)  | 92 (18, 696)  | 211 (25, 762)   |
| 1a.1    | 70 (5, 797)    | 263 (10, 2,513)    | 1,613                  | 372 (47, 2,174)  | 51 (17, 193)  | 20 (12, 63)     |
| 1a.2    | 134 (31, 897)  | 259 (30, 2,096)    | -                      | 342 (55, 2,211)  | 48 (-89, 212) | 54 (19, 778)    |
| 1a.3    | 327 (6, 1,124) | 863 (23, 1,448)    | 532 (-83, 1,276)       | 927 (201, 2,119) | 302 (15, 989) | 740 (66, 1,126) |
| 1a.4    | 272 (48, 761)  | 554 (65, 811)      | -                      | 111 (12, 765)    | 92 (54, 673)  | 174 (25, 723)   |
